# Supplementary material for: Implementation of a Community-Partnered Research Suicide-Risk Management Protocol: Case Study From Community Partners in Care
Source: Atypon-hosted journal article supplement (doi:10.1176/appi.ps.202000095), 2021-01-27
Supplement: appi.ps.202000095.ds001.pdf [file appi.ps.202000095.ds001.pdf]

### Frequency of outreach calls by study arm

| Survey   | RS    |                        |    | CEP   |                        |    | p    |
|----------|-------|------------------------|----|-------|------------------------|----|------|
|          | Total | Received outreach call |    | Total | Received outreach call |    |      |
|          | N     | N                      | %  | N     | N                      | %  |      |
| Baseline | 492   | 76                     | 16 | 488   | 67                     | 14 | .446 |
| 6 month  | 380   | 66                     | 17 | 379   | 62                     | 16 | .710 |
| 12 month | 364   | 23                     | 6  | 369   | 21                     | 6  | .721 |
| Overall  | 504   | 126                    | 25 | 514   | 126                    | 24 | .857 |

RS, Resources for services arm

CEP, Community-engaged protocols arm
